# Supplementary material for: Elevation Change of the Antarctic Ice Sheet: 1985 to 2020
Source: Copernicus journal article supplement (doi:10.5194/essd-2021-287), 2021-10-21
Supplement: Supplementary file [file essd-2021-287-AC2-supplement.pdf]

## Response to Reviewer - 2

We would like to thank the reviewer for taking the time to review and comment on this study which helped to improve the manuscript.

1. Line 16: Could the authors briefly mention what is novel about the approach?

This has been added to the text. L16-17

2. Figure 1: The meaning of the concentric circles and mission labels on the map is not entirely clear from the figure. Please clarify in the text that the circles indicate that there is missing data south of the specified circle for each mission. The meaning of the basins and basin numbers should be mentioned in the caption. Labels of different regions of Antarctica would be helpful for interpreting the text later in the manuscript. Also, it would be best to include a small colorbar indicating the velocity scale.

Changes have been made to the figure and the caption has been expanded.

3. Lines 130-131: Could the authors briefly mention what the 2 m threshold is applied to?

We have added more detailed explanation regarding this. (L134-135)

4. Lines 139-140: How does this compare to the LRM resolution?

LRM resolution is on the order of 1.5 km (radius) while SARIn has a 350 x 1500 m resolution. Expanded text to better explain this. (L145-146)

5. Line 155: Please elaborate briefly on how the “relocation method” works.

We have elaborated more on the relocation method in the text. (L175-177)

6. Lines 156-158: Bedmap2 would give more recent estimates of surface slope. Could this bias estimates from earlier periods and what might be the magnitude of this error?

Bedmap-2 was selected as it mostly contains data from ERS-1 and ICESat and thus provide a DEM that coincides in time with data altimetry we are trying to correct. We do not believe that it will cause any bias as both ERS-1, ERS-2, Envisat and LRM are corrected with the same dataset. One has to also remember that we do not need to correct any of the SARIn or laser altimetry data for the slope induced error. The only new dataset that needs to be corrected is the LRM data, but the data is located in the interior of the ice sheet which is very stable and see little change.

Hence, that the DEM is older does not introduce any major issue in our view.

7. Lines 160-168: It would be useful to have a simple schematic diagram summarizing the processing steps, as they are quite extensive and it is easy to lose sight of the bigger picture.

We have in the “Methods” section added a paragraph summarizing the different steps and in what order they are applied. (L159-167)

8. Lines 176-180: While the authors stated earlier that this was done separately for each mission and mode, it would be helpful to clarify here as well that (1) is done for each mission separately, and to clarify that the purpose of (1) is to establish a different “correction grid” that is suitable for each mission.

We have rewritten and added some text to better described this. (L191-214)

9. Line 183: By “center date” do the authors mean the center date of the mission? After establishing the mean topography for ascending and descending orbits separately, do the authors also then remove the mean for each orbit type within each mission separately? Please provide some additional details for clarity.

The center date in this case is the mean time of the mission and is used to center the “Asc” and “Des” time series to the elevation  $[h(t_0)]$ . Yes, we remove the spatial contribution of the model from both the A and D orbits (not the linear temporal term). The inclusion of the linear temporal term, centered a specific date, will aligned the data to the same residual elevation (intercept is zero for both at reference time). We have added some clarification in the text for this. (L191-214).

10. Line 185: Clarify that the “mathematical model” is a model of the surface topography. Also clarify that the differing number of coefficients is allowed to vary spatially.

We have added text to better describe this. (L207-208)

11. Lines 192-193: Clarify that this is done for each mission and mode separately.

This has been done. (L198, L203-204)

12. Line 195: Clarify that this selection of the best correction occurs when there are multiple centroids per data point.

Not entirely true as stated. If their already exists a solution in the output vector at a specific location that solution is only over-written if the new solution has a lower RMS. Added some more clarification about this. (L219-222)

13. Line 205: I don’t think this point about a linear temporal trend was not mentioned earlier. Can the authors mention this earlier in this section and briefly elaborate?

This has been added. (L193, L205, L212-213)

14. Line 220: Can the authors briefly explain why variability in the waveform shape can be used to remove these errors?

This has been added. (L245-247)

15. Line 231: Are the standard deviations here the standard deviations for the residuals of the Bs, LeW and TeS terms? If so I think the authors should use “dBs”, etc. for the subscript of s to be consistent with “dh”.

These are standard deviation from the variables themselves (not the residuals), so we did not provide any change in the manuscript related to this.

16. Line 264-265: Can the authors provide additional explanation as to which features are related to surface slope and meteorological signals?

We added some extra text to describe this. (L290-293)

17. Line 288: Here  $n_r=2$  is specified, but earlier a “four-term” Fourier series is mentioned. Should  $n_r=4$ ?

Good catch! We have changed it to four!

18. Lines 292-293: How does it work for the 2 km grid cell to have a 1 km search radius in some instances – could some data be ignored in this case?

In 99% of the time a 1 km search radius is too small and does not provide enough data to pass the 70% fill criteria. In reality we needed at least a search radius of 2-3 km to pass the 70% criteria. To avoid data being “lost” the algorithm increases the radius until 10 km is achieved for any node. If 10 km is reached and the time series is not filled it uses the available data. Some extra text has been added to better describe the process. (L326-327)

19. Lines 292-301: The 10 MAD correction is mentioned twice in this paragraph. Are these two different steps? Please clarify.

Yes, these are two different steps: The first step is a 1-year windowing filter and the second one is filtering based on model residuals. We have modified the text slightly to better explain this. (L333-335)

20. Line 306: Are Envisat and ICESat somehow combined here, or do the authors mean that a coefficient is created for ERS-2 to Envisat and ERS-2 to ICESat. In general, it is not entirely clear how Envisat and ICESat are combined in the final product. This should be discussed in further detail.

This was asked by the other reviewer as well and we have made it much more clear in the text how these offsets are generated and combined. We hope that it will clear up any confusion. (L318-335)

21. Line 342: Are these produced after the first calibration step? Please clarify.

See (20)

22. Line 343: Again, how has Envisat been grouped with ICESat?

See (20)

23. Line 353: For someone unfamiliar with these regions, it is difficult to know where they are on the map. Perhaps additional labels can be added to Figure 1, as noted above.

We have added some notation on Figure-1 that we hope will help. (L70-74)

24. Line 356: The authors have mentioned the offsets associated with the initial least squares adjustment, but have not provided any discussion of what happens after the final cross-calibration steps, which could be provided briefly here.

To reduce confusion, we added the step-by-step description in the beginning of Section 3 and expanded the text in the end of Section 3.2.3. We hope that fixes the issue. (L156-167)

25. Line 368-369: Suggest revising to read “After removal of the long-term trend, the amplitude normalization was computed for each mission, except for ICESat and CryoSat-2, according to:” so it is clear the formula is for the amplitude normalization.

This has been done

26. Line 372: It appears that  $a$ ,  $a_s$  and  $a_c$  are not defined. Please add definitions for these.

This has been done. (L414)

27. Lines 381-386: This discussion of the figure would be more appropriate in the main text.

We have moved some of this to the normalization section. (L419-422)

28. Line 395: Is this the REMA DEM? Please clarify.

No this is not REMA its bedmap2 we have made that clear in the text. (L437 and L480)

29. Lines 406-407: Clarify how the local surface roughness is determined. From the REMA DEM?

It's estimated from bedmap2, we have added this to the text. (L480)

30. Lines 426-428: The description here is a bit confusing. Which model is added back? Is it a surface extrapolated from ERS1/2 and Envisat?

We have re-written some of the text in this section to make this much clearer. (L456-476)

31. Lines 441-442: Can the authors add a brief explanation as to why this procedure was appropriate for the analysis in the paper but not for the data product?

A better explanation was added to the text. (L493-494)

32. Lines 464-479: I don't believe Table 1, or the description of the computed errors in Table 1, are mentioned in the text. Additionally, is there a column missing from Table 1 which provides the computed "sensor and mode error" for each sensor? How do these calculated errors fit in to the rest of the error analysis? Please clarify and revise the text appropriately.

There was an issue with the table numbering which is now fixed. You will find that Table-1 is now referenced several times, as is Table 2 and Table 3. The other reviewer asked the same question: Table 1 is now used only to provide the user a view of the overall quality of the missions, but are not used in the error calculation. Here, sigma-m represent or contains this error. This can be seen in the time-series by looking the magnitude of the error bars, where the older missions have larger errors. We have revised a large section of the text here. (L497-512)

33. Line 496: Mention here that the validation is discussed further in Section 5.  
Done

34. Line 506: Make clear that "JPL" is referring to the product described in this paper. Also, I would suggest referring to the authors' product as the "ITS\_LIVE" product throughout if the authors think that is reasonable.

Clarification has been added. We have chosen to retain the JPL name for now. This to allow it to be more processing center specific when comparing.

35. Line 541: I believe the reference to Figure 7c should be changed to "Figure 7e".

Thanks for catching this! It has been changed

36. Line 542: The reference to Figures 7d-e should be changed to "7f-g".

Thanks for catching this! It has been changed

37. Line 544: "Figure 7b" should be changed to "Figure 7c"

Thanks for catching this! It has been changed

38. Lines 542-545: Figure 7b (the comparison between JPL and ATM products) is not mentioned in the text. This should also be mentioned here.

This has now been added and discussed more in the text. (L603-605)

39. Line 545: I believe "the synthesis" refers to the JPL/ITS\_LIVE product, but this is unclear from the text. Please clarify.

Changed this to product

40. Lines 545-548: Here Figure 7a can be referenced.

Done

41. Line 555: Are the bias and error shown in Fig. 7f-g the bias and error for the JPL product? Please clarify.

We have changed the text to make that clear in the caption. (L607-614)

42. Lines 568-573: Could the authors mention briefly which source data were used for the TUD and CPOM products?  
[This has been added to the text](#)
43. Line 599: Can the authors note the general location of basin 3?  
[We have added the general location in the text](#)
44. Line 601: Change “we find for the 1992-2017...” to “we find the following volume change estimates for the 1992-2017...”  
[We changed it accordingly in the text.](#)
45. Line 607: I believe “extrapolation” refers to the hypsometric extrapolation. Please clarify.  
[This has been clarified in the text. \(L668-669\)](#)
46. Lines 607-608: The statement that the products agree well but are biased low seems contradictory. Please clarify. Also clarify that “low” refers to lower in magnitude.  
[We have changed the wording of the sentence accordingly. \(L672-673\)](#)
47. Line 611: Again, clarify that “low” refers to lower in magnitude.  
[This has been added](#)
48. Line 642 (Figure 9): I believe that the upper-right figure should read “JPL: 1992-2016” rather than “FDM: 1992-2016”.  
[Thanks for catching this! We have updated the figure.](#)
49. Lines 652-660: Somewhere in here the authors should reference Figures 10 and 11.  
[We have added mentions to different figures here](#)
50. Line 659: Specify the year rang for the “last decade” and the period for “EAIS has reverted back...”.  
[Range has been added](#)
51. Lines 667-670: The trends over the other periods in the EA2 region should be discussed so that the 1985-1989 period can be understood in context.  
[We have added discussion about other trends in EA2. \(L730-740\)](#)
52. Lines 682 and 683: Both Figures 10 and 11 could be referred to here, as it helps to look at these figures when interpreting the text below.  
[Added to manuscript](#)

53. Line 690: Figure 11 could also be referred to here.

Done

54. Line 701: The “earlier timing” is not apparent from the figure, but it is clear that there is a large increase in precipitation during 2006. Please clarify.

We have changed the text slightly and removed “timing”

55. Lines 704-706: Figure 10 could be referred to here.

Added

56. Lines 717-718: The strong negative trend for WAIS over the full timeseries should be mentioned here.

We have added text about the long-term negative trend in WAIS. (L797-798)

57. Line 732: Are the authors referring to improvements over previous work?

Please clarify.

Yes, as this is the first study that we know of that separates the inversion in this way. We have added some references. (L813)

58. Line 772: It is not entirely clear what is done in Figure 12. Is there a processing step additional to what was discussed in the methods section?

Please clarify.

Yes, it is an extra post processing step as the locally estimated correction might not always hold for larger regions. Hence, when a regional time series is generated, there might be need to re-align the Geosat data with the other part of the record. This is what was done in Figure 12 and it is mentioned in the discussion. We have expanded the text in the figure caption to make it clearer. (L857-859)

59. Line 791: What method is being referred to here. Does the correction discussed in the methods section bias the amplitude in the interior of the ice sheet, or is this what would happen if ICESat-2 were to be used?

We removed this paragraph as it was not really needed.

60. Line 811: Should this read “south of 81.5 S” rather than “north”?

Yes, it should be South. Thanks for catching that.

61. Line 815: What is the bias referred here relative to?

Here, the bias is reference in the form of direction. It should be positive but from the other products they are negative. We changed the text to make this clearer. (L896)

62. Line 845: Could the closer agreement with laser-altimetry validation data be affected by the inclusion of the laser-altimetry data in the development of the ITS\_LIVE dataset?

Yes, to a degree but in general the effect is small in our view. The rationale being that in areas of rapid change all three products agree well, but contain either little or no laser altimetry data (TUD and CPOM respectively). So, the improvement is more related to the new methodology and use of algorithms. Unfortunately, the ICESat data included in our and the TUD product is overshadowed by the Envisat data, due to its much higher spatial and temporal sampling. It does improve the solution, but due to the sheer number of Envisat points it has less impacts on the validation statistics. The sampling difference of Envisat and ICESat can be seen here: <https://www.science.org/action/downloadSupplement?doi=10.1126%2Fscience.aaa5727&file=outers-sm.pdf> in Figure S9.

63. Lines 852-853: But the authors do mention above this point that there can be errors in the altimetry data in this region. Could this affect the comparison with the firn densification models. Please clarify.

Here we were referring to the Geosat data over the Totten region and not all the data. The 1992-2020 data are of good quality. We have added some wording to explain what time period we are referring to. (L935)

64. Line 877: Suggest adding “Our dataset indicates that...” before the beginning of this sentence.

Thank you! It has been added.

#### Technical Corrections

1. Line 9: Change “losses” to “loses”.

Fixed

2. Line 11: Change “sea levels rise” to “sea level rise”

Fixed

3. Line 53: Change “inter mission” to “inter-mission”

Fixed

4. Line 100: I believe these are two different flags. If so, then revised to read “quality flags” and “were used”. Also, is it “chirp” rather than “chip”?

Fixed

5. Line 123: Change “that uses 532 nm laser” to “that uses a 532 nm laser”.

Fixed

6. Line 125: Change “arrange” to “arranged”

Fixed

7. Lines 170-190: To improve readability I would suggest creating a new paragraph for each correction (1,2, and 3), or add italics in the text, e.g. “Issue

(1): To account for differences in orbital geometry when applying the correction...”

We have added italic font to this paragraph to make it easier to read.

8. Line 259: Figure 5 is mentioned before Figure 4. Suggest switching the two.

We have changed the text to point to Section 3.2.4 as we have moved a lot of the justification from Figure 5 to this section.

9. Line 267 (Figure 3): Change “CS-2 LRM” and “CS-2 SIN” to “Cryosat-2 LRM” and “Cryosat-2 SarIn” for clarity.

We have changed the figure accordingly

10. Line 281: Correct “Bevis etl al.”

Corrected

11. Line 436: Suggest revising to “To estimate volume changes at the basin scale (Figure 1)” so that it is clear that “Figure 1” provides the basin outlines and not the volume changes.

Changed

12. Line 450: I believe Fig. 6 should be referred to here, rather than Fig. 2.

Fixed and rewritten

13. Line 565: Change “where ICESat-2 shows” to “with ICESat-2 showing”.

Changed

14. Line 584: Change “(as CPOM only provides rates in five-year intervals of all products...” to “(as CPOM only provides rates in five-year intervals) for all products”

Changed

15. Line 599: Change to read “Larger differences between JPL and CPOM compared to JPL versus TUD...”

Changed

16. Lines 603-604: Change to read “The regional estimates agree well among products, with the largest discrepancies found in the Antarctic Peninsula.”

Changed

17. Line 621: Change “average surface temperature, 10 m windspeed...” to “average surface temperature, and 10 m windspeed...”.

Changed

18. Line 635: Change “-25 km<sup>3</sup> a<sup>1</sup>” to “-25 km<sup>3</sup> a<sup>-1</sup>”.

Changed

19. Lines 649-650: Change “East Antarctic Ice Sheet (...) that experienced” to “East Antarctic Ice Sheet (...), which experienced”

Changed

20. Lines 651: Change “measure elevation change is” to “measure elevation change of is”.

Changed

21. Line 666: Change “the precipitation event” to “a precipitation event”.

Changed

22. Line 672: Change “panning1985 to 2020” to “spanning 1985 to 2020”.

Changed

23. Line 688: Change “Basin 18, that contains...” to “Basin 18, which contains...”

Changed

24. Line 719: Change “landfalls” to “landfall”.

Changed

25. Line 743: Change “importance of this correction that can” to “importance of this correction, which can”

Changed

26. Line 756: Change “that large ice sheet wide changes occur” to “the large ice sheet-wide changes that occur”

Changed

27. Line 769: Change “long-time separation” to “long time separation”.

Changed

28. Line 777: Change “applied to the data align” to “applied to the data to align”.

Fixed and rewritten

29. Line 792: Change “than than” to “than that”

Fixed and rewritten

30. Line 796: Change the comma after “maximum orbital coverage” to a semicolon.

Changed

31. Line 827: Change “contribution significantly” to “contribute significantly”.

Changed

32. Line 830: Change “overall uncertainty estimates” to “overall uncertainty estimate”.

Changed

33. Line 831: Change “ice sheet but rapidly increase closer” to “ice sheet, which rapidly increases closer”.

Changed

34. Line 841: Change “with difference within” to “with differences within”

Changed

35. Line 848: Change “across mission” to “across missions”.

Changed

36. Line 866: Change “captoolkit - Cryosphere Altimetry Processing Toolkit” to “Cryosphere Altimetry Processing Toolkit (captoolkit)”.

Changed
